# Supplementary material for: Endovascular Thrombectomy Versus Intravenous Thrombolysis of Posterior Cerebral Artery Occlusion Stroke
Source: PubMed Central journal article supplement — J Stroke. 2024 May 30;26(2):290–9. doi: 10.5853/jos.2024.00458 (PMC11164587; doi:10.5853/jos.2024.00458), 2024-05-30
Supplement: jos-2024-00458-Supplementary.pdf [file jos-2024-00458-Supplementary.pdf]

**Supplementary Table 1.** Doubly robust regression analyses of outcomes according to treatment (EVT+/-IVT vs. IVT alone) in a sensitivity cohort excluding patients with missing data on onset-to-treatment time

|                     | EVT+/-IVT<br>(n=346) | IVT<br>(n=319) | Adj. OR<br>(95% CI)*          | Missing<br>data |
|---------------------|----------------------|----------------|-------------------------------|-----------------|
| mRS at 3 months     | 2 (1-4)              | 2 (1-3)        | 1.28 (0.92-1.79) <sup>†</sup> | 36/28           |
| mRS 0-1 at 3 months | 103 (33.2)           | 84 (28.9)      | 1.66 (1.10-2.50) <sup>†</sup> | 36/28           |
| mRS 0-2 at 3 months | 161 (51.9)           | 164 (56.4)     | 1.21 (0.79-1.87)              | 36/28           |
| ENI                 | 205 (65.1)           | 163 (53.8)     | 1.67 (1.11-2.50)              | 31/16           |
| Mortality           | 50 (16.1)            | 29 (10.0)      | 1.33 (0.75-2.35) <sup>‡</sup> | 36/28           |
| sICH                | 22 (6.4)             | 8 (2.5)        | 2.50 (0.92-6.82) <sup>‡</sup> | 4/0             |

Values are presented as median (interquartile range) or n (%) unless otherwise indicated.

EVT, endovascular thrombectomy; IVT, intravenous thrombolysis; OR, odds ratio; CI, confidence interval; mRS, modified Rankin Scale; ENI, early neurological improvement; sICH, symptomatic intracerebral hemorrhage; NIHSS, National Institutes of Health Stroke Scale.

\*Doubly robust regression model (inverse probability weighted regression adjustment model) including treatment group (EVT+/-IVT vs. IVT only), age, sex, hypertension, diabetes, atrial fibrillation, NIHSS score at baseline, posterior circulation Acute Stroke Prognosis Early CT Score (pc-ASPECTS) at baseline, level of occlusion, year of treatment, and onset-to-treatment time ≤4.5 hours; <sup>†</sup>Common OR; <sup>‡</sup>The model did not converge with occlusion, so it was excluded.

**Supplementary Table 2.** Doubly robust regression analyses of outcomes according to treatment (EVT only vs. EVT+IVT)

|                    | EVT<br>(n=236) | EVT+IVT<br>(n=164) | Adj. OR<br>(95% CI)*          | Missing<br>data |
|--------------------|----------------|--------------------|-------------------------------|-----------------|
| mRS at 90 days     | 3 (1-5)        | 2 (1-4)            | 0.65 (0.44-0.96) <sup>†</sup> | 24/17           |
| mRS 0-1 at 90 days | 56 (26.4)      | 58 (39.5)          | 0.60 (0.37-0.98) <sup>†</sup> | 24/17           |
| mRS 0-2 at 90 days | 92 (43.4)      | 89 (60.5)          | 0.55 (0.34-0.89)              | 24/17           |
| ENI                | 125 (59.5)     | 111 (71.6)         | 0.69 (0.43-1.01)              | 26/9            |
| Mortality          | 40 (18.9)      | 18 (12.2)          | 1.45 (0.75-2.79) <sup>‡</sup> | 24/17           |
| sICH               | 13 (5.6)       | 11 (6.7)           | 0.85 (0.34-2.10) <sup>‡</sup> | 3/1             |

Values are presented as median (interquartile range) or n (%) unless otherwise indicated.

EVT, endovascular thrombectomy; IVT, intravenous thrombolysis; OR, odds ratio; CI, confidence interval; mRS, modified Rankin Scale; ENI, early neurological improvement; sICH, symptomatic intracerebral hemorrhage; NIHSS, National Institutes of Health Stroke Scale.

\*Doubly robust regression model (inverse probability weighted regression adjustment model) including treatment group (EVT only vs. EVT+IVT), age, sex, hypertension, diabetes, atrial fibrillation, NIHSS score at baseline, posterior circulation Acute Stroke Prognosis Early CT Score (pc-ASPECTS) at baseline, level of occlusion, and year of treatment; <sup>†</sup>Common OR; <sup>‡</sup>The model did not converge with level of occlusion, so it was excluded.

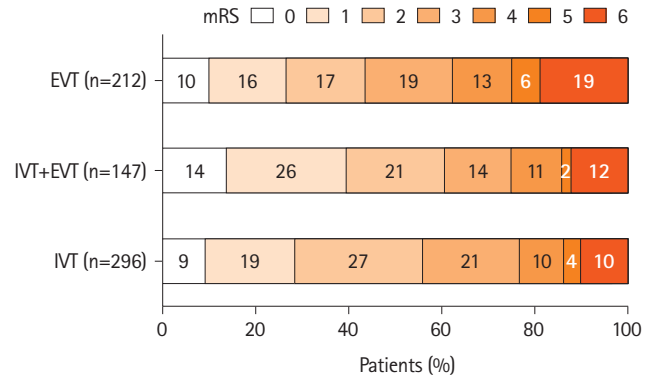

**Supplementary Figure 1.** Distribution of the 3-month modified Rankin Scale (mRS) in patients with isolated posterior cerebral artery occlusion by endovascular therapy (EVT) alone versus EVT with intravenous thrombolysis (IVT) versus IVT alone.
